# Supplementary material for: Efficacy of a Newly Developed Guidewire for Selective Biliary Cannulation: A Multicenter Randomized Controlled Trial
Source: MDPI journal article supplement (doi:10.3390/jcm12103440), 2023-05-12

## Supplementary Materials

Supplementary Table S1. Laboratory finding for each group.

|                 | NGW (n=95)    | CGW (n=95)    | p-value |
|-----------------|---------------|---------------|---------|
| WBC             | 7.5 ± 3.5     | 8.4 ± 4.2     | 0.112   |
| Hemoglobin      | 12.5 ± 1.9    | 12.5 ± 2.0    | 0.783   |
| Platelet        | 228.0 ± 76.6  | 237.1 ± 81.8  | 0.429   |
| INR             | 1.08 ± 0.19   | 1.08 ± 0.13   | 0.954   |
| Total bilirubin | 3.56 ± 4.88   | 3.97 ± 5.72   | 0.595   |
| AST             | 233.2 ± 312.5 | 190.9 ± 243.5 | 0.300   |
| ALT             | 219.5 ± 294.4 | 196.7 ± 214.8 | 0.541   |
| ALP             | 229.5 ± 185.9 | 298.8 ± 284.5 | 0.050   |
| rGT             | 370.5 ± 358.3 | 524.4 ± 539.2 | 0.026   |
| Amylase         | 63.0 ± 33.5   | 68.4 ± 48.1   | 0.404   |
| Lipase          | 58.3 ± 44.6   | 65.3 ± 61.9   | 0.409   |

Supplementary Figure S1. Upper and lower plateau stress test.

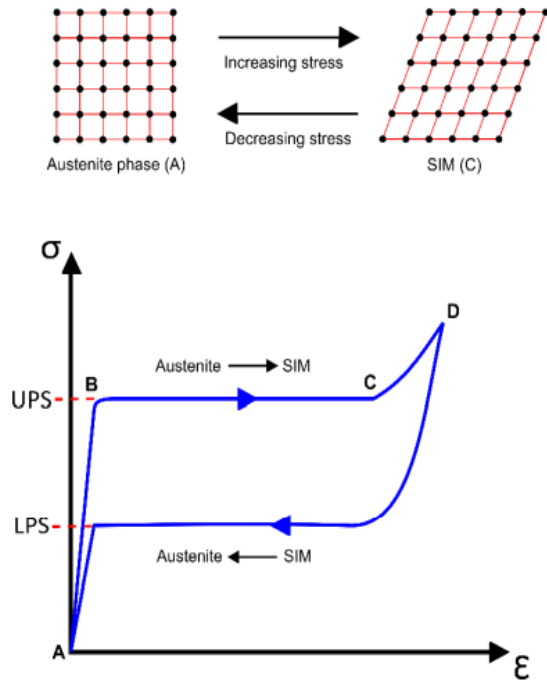

**Supplementary Figure S2. Guidewire friction test.**

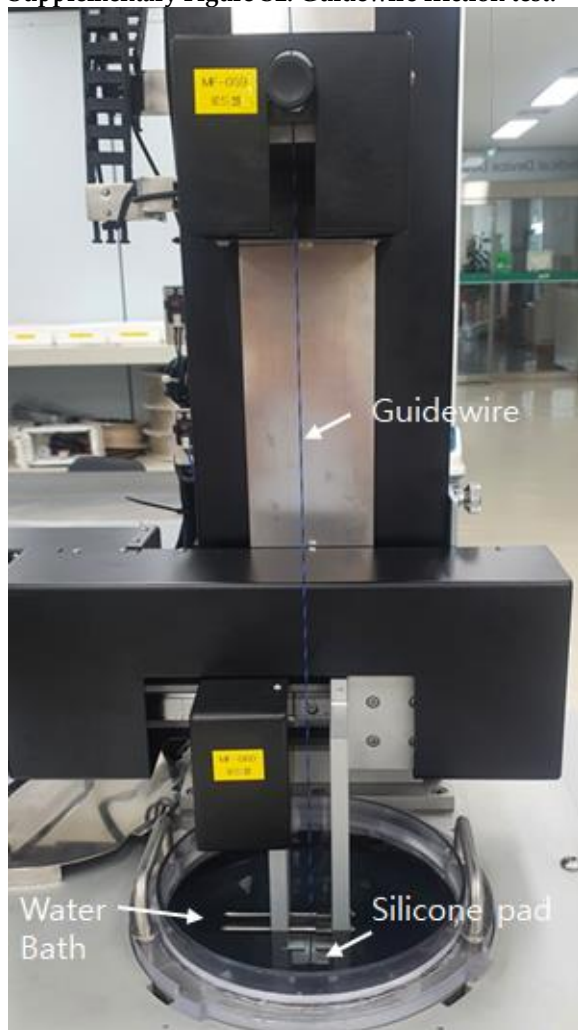

Supplementary Figure S3. Tip stiffness according to the length point of guidewire distal tip.

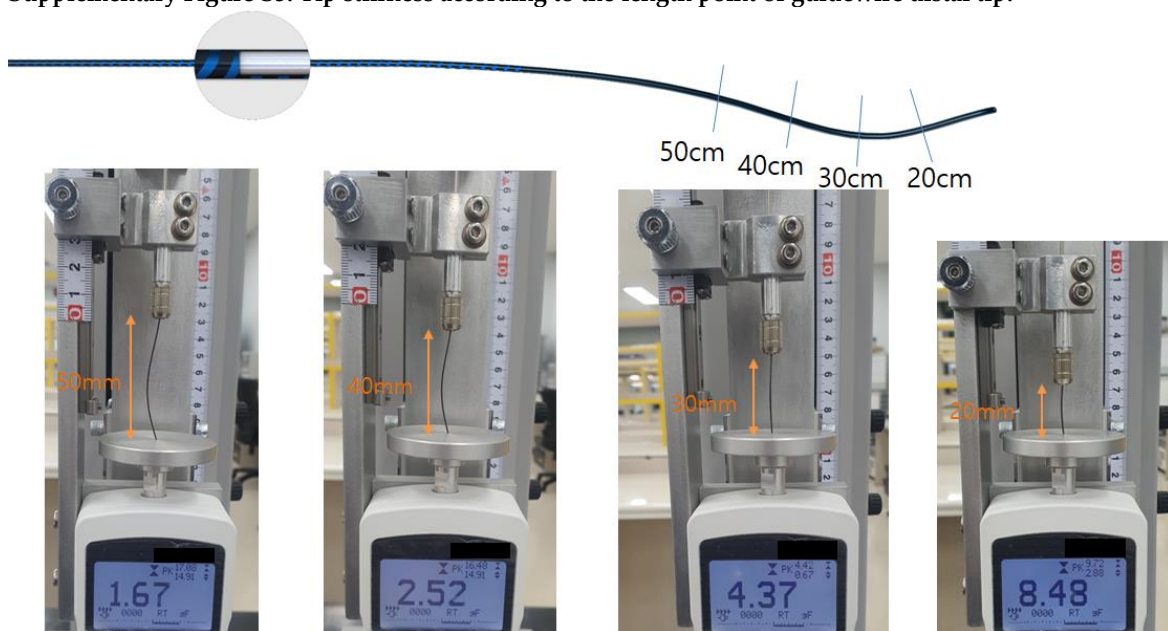

Supplement: s1 [file s1]
